# Supplementary material for: TERT Gene Fusions Characterize a Subset of Metastatic Leydig Cell Tumors
Source: PubMed Central journal article supplement (PMC9907364; doi:10.1016/j.clgc.2021.02.002), 2021-02-18
Supplement: NIHMS1863327-supplement-33741265_MarkkuMiettinen_Supplefigs1.pdf [file NIHMS1863327-supplement-33741265_MarkkuMiettinen_Supplefigs1.pdf]

## Next-generation Sequencing (NGS) (Caris Life Sciences)

### Point Mutations, Indels and Copy Number Alterations\* (DNA)

|          |                 |         |        |                    |                  |         |         |         |          |
|----------|-----------------|---------|--------|--------------------|------------------|---------|---------|---------|----------|
| ABL2     | BRCA1           | CREB3L1 | ETV5   | GID4<br>(C17orf39) | KNL1             | NACA    | PIM1    | SDHC    | TNFRSF17 |
| ACSL3    | BRCA2           | CREB3L2 | ETV6   | GMPS               | KRAS             | NCKIPSD | PML     | SDHD    | TOP1     |
| ACSL6    | BRIP1           | CREBBP  | EWSR1  | GNA13              | KTN1             | NCOA1   | PMS2    | SEPT9   | TP53     |
| ADGRA2   | BUB1B           | CRKL    | EXT1   | GNAQ               | LCK              | NCOA2   | POLE    | SET     | TPM3     |
| AFDN     | CACNA1D         | CRTC1   | EXT2   | GNAS               | LCP1             | NCOA4   | POT1    | SETBP1  | TPM4     |
| AFF1     | CALR            | CRTC3   | EZH2   | GOLGA5             | LGR5             | NF1     | POU2AF1 | SETD2   | TPR      |
| AFF3     | CAMTA1          | CSF1R   | EZR    | GOPC               | LHFPL6           | NF2     | PPARG   | SF3B1   | TRAF7    |
| AFF4     | CANT1           | CSF3R   | FANCA  | GPHN               | LIFR             | NFE2L2  | PRCC    | SH2B3   | TRIM26   |
| AKAP9    | CARD11          | CTCF    | FANCC  | GRIN2A             | LPP              | NFIB    | PRDM1   | SH3GL1  | TRIM27   |
| AKT2     | CARS            | CTLA4   | FANCD2 | GSK3B              | LRIG3            | NFKB2   | PRDM16  | SLC34A2 | TRIM33   |
| AKT3     | CASP8           | CTNNA1  | FANCE  | H3F3A              | LRP1B            | NFKBIA  | PRKAR1A | SMAD2   | TRIP11   |
| ALDH2    | CBFA2T3         | CTNNB1  | FANCG  | H3F3B              | LYL1             | NIN     | PRRX1   | SMAD4   | TRRAP    |
| ALK      | CBFB            | CYLD    | FANCL  | HERPUD1            | MAF              | NOTCH2  | PSIP1   | SMARCB1 | TSC1     |
| APC      | CBL             | CYP2D6  | FAS    | HGF                | MALT1            | NPM1    | PTCH1   | SMARCE1 | TSC2     |
| ARFRP1   | CBLB            | DAXX    | FBXO1  | HIP1               | MAML2            | NR4A3   | PTEN    | SMO     | TSHR     |
| ARHGAP26 | CCDC6           | DDR2    | FBXW7  | HMGA1              | MAP2K1<br>(MEK1) | NSD1    | PTPN11  | SNX29   | TTL      |
| ARHGEF12 | CCNB1P1         | DDX10   | FCRL4  | HMGA2              | MAP2K2<br>(MEK2) | NSD2    | PTPRC   | SOX10   | U2AF1    |
| ARID1A   | CCND1           | DDX5    | FGF10  | HNRNPA2B1          | MAP2K4           | NSD3    | RABEP1  | SPECC1  | USP6     |
| ARID2    | CCND2           | DDX6    | FGF14  | HOOK3              | MAP3K1           | NT5C2   | RAC1    | SPEN    | VEGFA    |
| ARNT     | CCND3           | DEK     | FGF19  | HSP90AA1           | MCL1             | NTRK1   | RAD50   | SRGAP3  | VEGFB    |
| ASPCR1   | CCNE1           | DICER1  | FGF23  | HSP90AB1           | MDM2             | NTRK2   | RAD51   | SRSF2   | VTI1A    |
| ASXL1    | CD274<br>(PDL1) | DOT1L   | FGF3   | IDH1               | MDM4             | NTRK3   | RAD51B  | SRSF3   | WDCP     |

|         |        |                  |         |              |        |                 |          |          |        |
|---------|--------|------------------|---------|--------------|--------|-----------------|----------|----------|--------|
| ATF1    | CD74   | EBF1             | FGF4    | IDH2         | MDS2   | NUP214          | RAF1     | SS18     | WIF1   |
| ATIC    | CD79A  | ECT2L            | FGF6    | IGF1R        | MEF2B  | NUP93           | RALGDS   | SS18L1   | WISP3  |
| ATM     | CDC73  | EGFR             | FGFR1   | IKZF1        | MEN1   | NUP98           | RANBP17  | STAT3    | WRN    |
| ATP1A1  | CDH11  | ELK4             | FGFR1OP | IL2          | MET    | NUTM1           | RAP1GDS1 | STAT4    | WT1    |
| ATR     | CDK4   | ELL              | FGFR2   | IL21R        | MITF   | PALB2           | RARA     | STAT5B   | WWTR1  |
| AURKA   | CDK6   | EML4             | FGFR3   | IL6ST        | MLF1   | PAX3            | RB1      | STIL     | XPA    |
| AURKB   | CDK8   | EMSY             | FGFR4   | IL7R         | MLH1   | PAX5            | RBM15    | STK11    | XPC    |
| AXIN1   | CDKN1B | EP300            | FH      | IRF4         | MLLT1  | PAX7            | REL      | SUFU     | XPO1   |
| AXL     | CDKN2A | EPHA3            | FHIT    | ITK          | MLLT10 | PBRM1           | RET      | SUZ12    | YWHAE  |
| BAP1    | CDX2   | EPHA5            | FIP1L1  | JAK1         | MLLT3  | PBX1            | RICTOR   | SYK      | ZMYM2  |
| BARD1   | CHEK1  | EPHB1            | FLCN    | JAK2         | MLLT6  | PCM1            | RMI2     | TAF15    | ZNF217 |
|         |        |                  |         |              |        |                 |          |          |        |
| BCL10   | CHEK2  | EPS15            | FLI1    | JAK3         | MXN1   | PCSK7           | RNF43    | TCF12    | ZNF331 |
| BCL11A  | CHIC2  | ERBB2 (HER2/NEU) | FLT1    | JAZF1        | MRE11  | PDCD1 (PD1)     | ROS1     | TCF3     | ZNF384 |
| BCL2L11 | CHN1   | ERBB3 (HER3)     | FLT3    | KDM5A        | MSH2   | PDCD1LG2 (PDL2) | RPL22    | TCF7L2   | ZNF521 |
| BCL3    | CIC    | ERBB4 (HER4)     | FLT4    | KDR (VEGFR2) | MSH6   | PDGFB           | RPL5     | TET1     | ZNF703 |
| BCL6    | CIITA  | ERC1             | FNBP1   | KEAP1        | MSI2   | PDGFRA          | RPN1     | TET2     |        |
| BCL7A   | CLP1   | ERCC2            | FOXA1   | KIAA1549     | MTOR   | PDGFRB          | RPTOR    | TFEB     |        |
| BCL9    | CLTC   | ERCC3            | FOXO1   | KIF5B        | MYB    | PDK1            | RUNX1    | TFG      |        |
| BCR     | CLTCL1 | ERCC4            | FOXP1   | KIT          | MYC    | PER1            | RUNX1T1  | TFRC     |        |
| BIRC3   | CNBP   | ERCC5            | FUBP1   | KLHL6        | MYCN   | PICALM          | SBDS     | TGFBR2   |        |
| BLM     | CNTRL  | ERG              | FUS     | KMT2A (MLL)  | MYD88  | PIK3CA          | SDC4     | TLX1     |        |
| BMPR1A  | COPB1  | ESR1             | GAS7    | KMT2C (MLL3) | MYH11  | PIK3R1          | SDHAF2   | TNFAIP3  |        |
| BRAF    | CREB1  | ETV1             | GATA3   | KMT2D (MLL2) | MYH9   | PIK3R2          | SDHB     | TNFRSF14 |        |
