# Supplementary material for: TERT Gene Fusions Characterize a Subset of Metastatic Leydig Cell Tumors
Source: PubMed Central journal article supplement (PMC9907364; doi:10.1016/j.clgc.2021.02.002), 2021-02-18
Supplement: NIHMS1863327-supplement-33741265_MarkkuMiettinen_Supplefigs2.pdf [file NIHMS1863327-supplement-33741265_MarkkuMiettinen_Supplefigs2.pdf]

## Fusions panel (n=54) (Caris Life Sciences)

|          |      |       |       |        |        |       |         |
|----------|------|-------|-------|--------|--------|-------|---------|
| ABL      | BRD3 | ETV5  | INSR  | MYB    | NUMBL  | PRKCA | RSPO3   |
| AKT3     | BRD4 | ETV6  | MAML2 | NOTCH1 | NUTM1  | PRKCB | TERT    |
| ALK      | EGFR | EWSR1 | MAST1 | NOTCH2 | PDGFRA | RAF1  | TFE3    |
| ARHGAP26 | ERG  | FGFR1 | MAST2 | NRG1   | PDGFRB | RELA  | TFEB    |
| AXL      | ESR1 | FGFR2 | MET   | NTRK1  | PIK3CA | RET   | THADA   |
| BCR      | ETV1 | FGFR3 | MSMB  | NTRK2  | PKN1   | ROS1  | TMPRSS2 |
| BRAF     | ETV4 | FGR   | MUSK  | NTRK3  | PPARG  | RSPO2 |         |
